# Supplementary material
Source: Springer Nature journal article supplement (https://www.springermedizin.de/resource/supplementary/12902_2013_209_MOESM2_ESM.pdf/9515762)

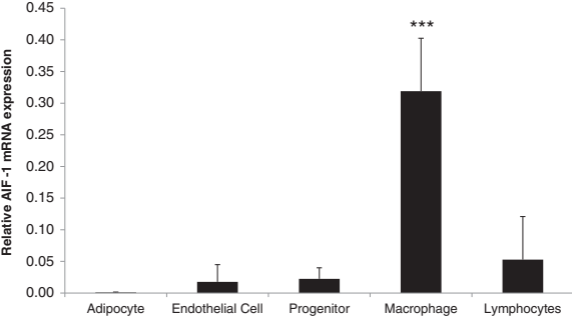

Supplement: MOESM2 [file 9515762]
